# Supplementary material for: Nicardipine sensitizes temozolomide by inhibiting autophagy and promoting cell apoptosis in glioma stem cells
Source: PubMed Central journal article supplement (PMC7993688; doi:10.18632/aging.202539), 2021-02-17
Supplement: aging-13-202539-s001.pdf [file aging-13-202539-s001.pdf]

## SUPPLEMENTARY FIGURE

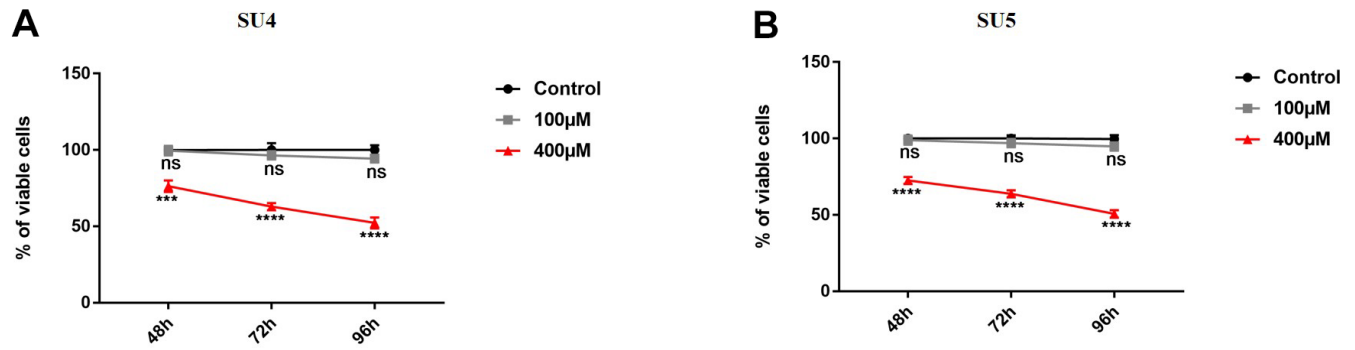

**Supplemental Figure 1. The viability of GSCs in different concentration and time point of TMZ.** Cell viability of GSCs SU4 and SU5 determined by CCK-8 assay after 48 h, 72 h or 96 h of TMZ (100 µM or 400 µM) treatment (A, B). \*\*\*  $p < 0.001$ , \*\*\*\*  $p < 0.0001$ .
